# Supplementary material
Source: MDPI journal article supplement (https://www.mdpi.com/2311-7524/10/3/264)
Supplement: s1 [file s1]

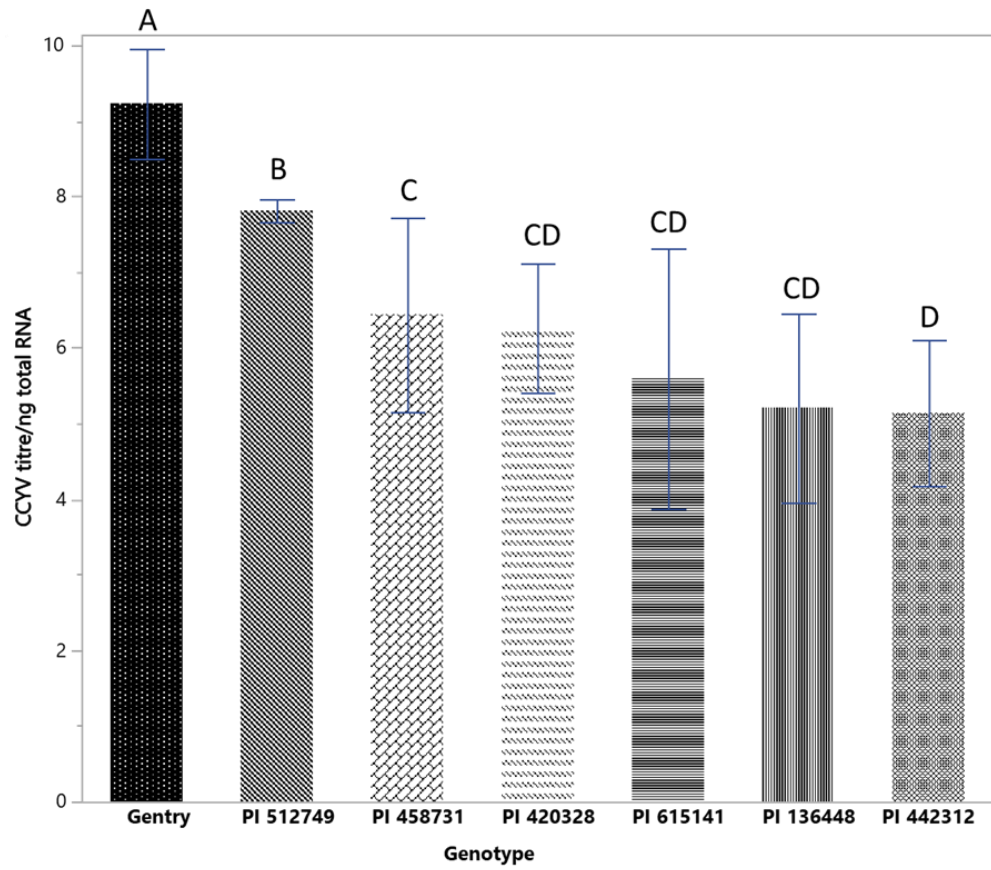

**Figure S1.** The mean virus titre in all the PI accessions was significantly lower than that in Gentry at 30 DAI in mass exposure experiments.
